# Supplementary material
Source: PubMed Central journal article supplement (PMC443534)
Supplement: nar_32_11_3446__1.pdf [file nar_32_11_3446__1.pdf]

**Supplementary Table: <sup>1</sup>H chemical shifts of RNA duplexes**

| <b>A</b>   | <b>H2/H5</b> | <b>H8/H6</b> | <b>H1'</b> | <b>H2'</b> | <b>H3'</b> | <b>Imino</b> | <b>Amino</b> |
|------------|--------------|--------------|------------|------------|------------|--------------|--------------|
| <b>C1</b>  | 5.99         | 8.06         | 5.56       | 4.33       | 4.56       | —            | —            |
| <b>G2</b>  | —            | 7.78         | 5.76       | 4.55       | 4.71       | 12.33        | 5.77 / 7.86  |
| <b>C3</b>  | 5.29         | 7.69         | 5.48       | 4.52       | 4.56       | —            | 6.71 / 8.26  |
| <b>A4</b>  | 6.71         | 7.94         | 5.85       | 4.63       | 4.71       | —            | 6.30 / 7.74  |
| <b>A5</b>  | 7.63         | 7.77         | 5.82       | 4.41       | 4.54       | —            | 6.80 / 7.83  |
| <b>U6</b>  | 4.99         | 7.53         | 5.41       | 4.28       | 4.40       | 13.94        | —            |
| <b>U7</b>  | 5.49         | 7.89         | 5.62       | 4.44       | 4.55       | 13.06        | —            |
| <b>G8</b>  | —            | 7.69         | 5.74       | 4.42       | 4.57       | 13.00        | —            |
| <b>C9</b>  | 5.18         | 7.56         | 5.42       | 4.26       | 4.40       | —            | 6.73 / 8.29  |
| <b>G10</b> | —            | 7.53         | 5.79       | 4.18       | 4.24       | 12.78        | —            |

| <b>B</b>   | <b>H2/H5</b> | <b>H8/H6</b> | <b>H1'</b> | <b>H2'</b> | <b>H3'</b> | <b>Imino</b> | <b>Amino</b> |
|------------|--------------|--------------|------------|------------|------------|--------------|--------------|
| <b>C1</b>  | 5.99         | 8.07         | 5.54       | 4.34       | 4.56       | —            | —            |
| <b>G2</b>  | —            | 7.80         | 5.78       | 4.56       | 4.72       | 12.39        | 5.90 / 8.00  |
| <b>C3</b>  | 5.32         | 7.72         | 5.49       | 4.53       | 4.57       | —            | 6.70 / 8.30  |
| <b>A4</b>  | 6.67         | 7.96         | 5.88       | 4.67       | 4.72       | —            | 6.35 / 7.84  |
| <b>A5</b>  | 7.65         | 7.76         | 5.82       | 4.44       | 4.54       | —            | 6.85 / —     |
| <b>U6</b>  | 4.97         | 7.57         | 5.39       | 3.57       | 4.55       | 14.09        | —            |
| <b>U7</b>  | 5.50         | 7.83         | 5.59       | 4.55       | 4.48       | 13.00        | —            |
| <b>G8</b>  | —            | 7.71         | 5.76       | 4.43       | 4.61       | 13.05        | —            |
| <b>C9</b>  | 5.20         | 7.57         | 5.43       | 4.28       | 4.43       | —            | 6.77 / 8.32  |
| <b>G10</b> | —            | 7.54         | 5.81       | 4.19       | 4.26       | 12.76        | —            |

| <b>C</b>   | <b>H2/H5</b> | <b>H8/H6</b> | <b>H1'</b> | <b>H2'</b> | <b>H3'</b> | <b>Imino</b> | <b>Amino</b> |
|------------|--------------|--------------|------------|------------|------------|--------------|--------------|
| <b>C1</b>  | 6.00         | 8.09         | 5.56       | 4.34       | 4.57       | —            | —            |
| <b>G2</b>  | —            | 7.80         | 5.79       | 4.57       | 4.72       | 12.47        | 5.88 / 7.88  |
| <b>C3</b>  | 5.32         | 7.72         | 5.48       | 4.49       | 4.57       | —            | 6.76 / 8.35  |
| <b>A4</b>  | 6.80         | 7.97         | 5.86       | 4.66       | 4.75       | —            | 6.36 / 7.88  |
| <b>A5</b>  | 7.70         | 7.83         | 5.82       | 4.34       | 4.56       | —            | 7.03 / —     |
| <b>U6</b>  | 5.03         | 7.70         | 5.32       | 3.82       | 4.68       | 14.65        | —            |
| <b>U7</b>  | 5.55         | 7.99         | 5.47       | 4.34       | 4.54       | 13.07        | —            |
| <b>G8</b>  | —            | 7.71         | 5.74       | 4.41       | 4.55       | 13.10        | —            |
| <b>C9</b>  | 5.19         | 7.58         | 5.42       | 4.27       | 4.43       | —            | 6.80 / 8.37  |
| <b>G10</b> | —            | 7.54         | 5.81       | 4.19       | 4.27       | 12.77        | —            |

Proton chemical shifts of (A) 2'-hydroxyl, (B) 2'-amino, and (C) 2'-ethylureido RNA duplexes used for molecular modeling. The chemical shift of the H<sub>2</sub>O peak (at 15 °C) was used as a reference.
